# Supplementary material
Source: PubMed Central journal article supplement (PMC3463363)
Supplement: supp_M112.373308_jbc.M112.373308-1.pdf [file supp_M112.373308_jbc.M112.373308-1.pdf]

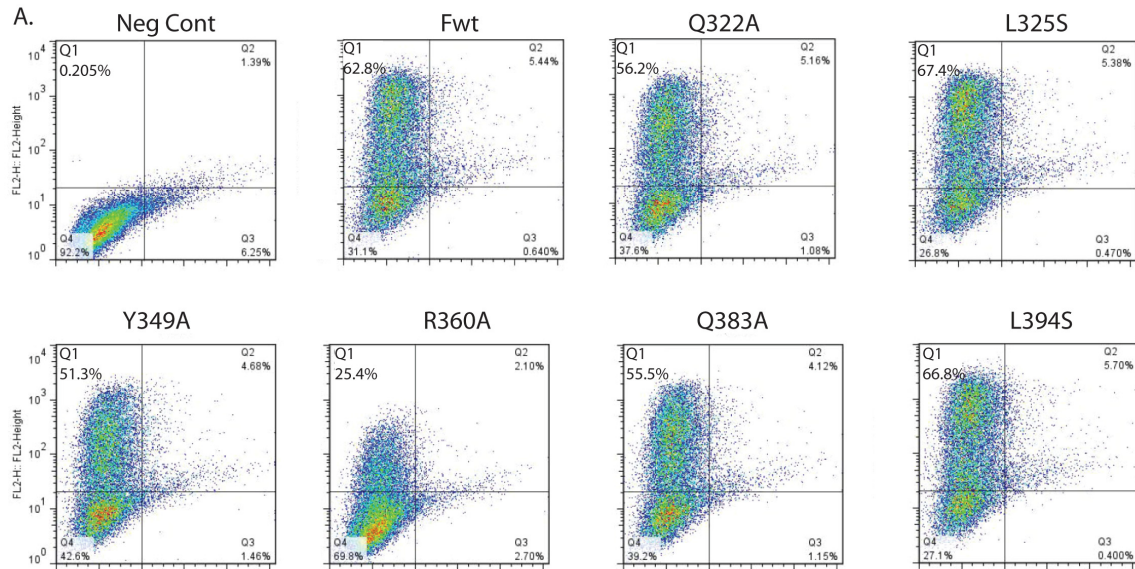

B.

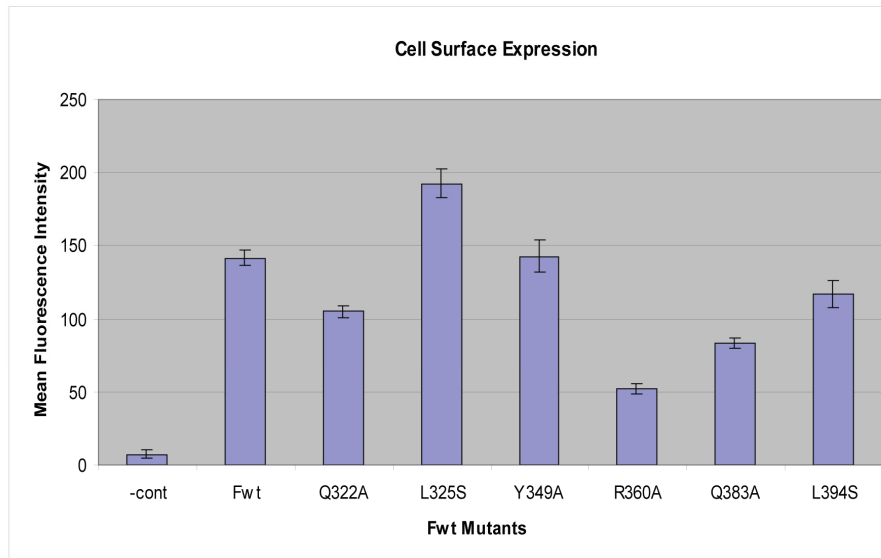

**SUPPLEMENTAL FIGURE 1. Cell surface expression of mutant F proteins.**

Vero/hSLAM cells were transfected with plasmids expressing the wild type (Fwt) or mutant F proteins and 40 hrs post-transfection the cells were detached by incubating with Versene (Invitrogen, Carlsbad, CA) for 10 min at room temperature, washed 3X with FACS washing buffer (1X PBS, 2% FBS, 0.1% NaN<sub>3</sub>) and probed with an anti-F primary antibody (1:1000 dilution) for 1 hr at 4°C. After incubation with the primary antibody the cells were washed 3X with FACS washing buffer and probed with Phycoerythrin-conjugated secondary antibody (1:500 dilution) for 1 hr at 4°C. After secondary antibody incubation the cells were washed 3X with FACS washing buffer, fixed in 4% paraformaldehyde and read by FACSCalibur (BD Biosciences, San Jose, CA). A. Representative FACS data is shown for each mutant. Neg Cont, negative control: empty plasmid. B. The mean fluorescence intensity for each mutant is indicated. The error bars represent standard deviations based on three independent experiments. The

results were analyzed by FlowJo software (Tree Star Inc., Ashland, OR). –cont, negative control: empty plasmid.
